# Supplementary material for: Effectiveness of the Pilates method versus aerobic exercises in the treatment of older adults with chronic low back pain: a randomized controlled trial protocol
Source: Springer Nature journal article supplement (doi:10.1186/s12891-019-2642-9), 2019-05-24
Supplement: MOESM2 [file 16748774]

APPENDIX 2- Mat based-exercises

| <b>Spine exercises</b>                                                                                                                                                                                                                                    |                                                                                                                                                                                                                                                               |                                                                                                                                                                                                                                               |
|-----------------------------------------------------------------------------------------------------------------------------------------------------------------------------------------------------------------------------------------------------------|---------------------------------------------------------------------------------------------------------------------------------------------------------------------------------------------------------------------------------------------------------------|-----------------------------------------------------------------------------------------------------------------------------------------------------------------------------------------------------------------------------------------------|
| <b>Basic</b>                                                                                                                                                                                                                                              | <b>Intermediate</b>                                                                                                                                                                                                                                           | <b>Advanced</b>                                                                                                                                                                                                                               |
| <p><b>Bridge</b></p>  <p>Objective: mobilize pelvis and spine and strengthen gluteus and hamstring muscles.</p>                                                          | <p><b>Bridge Variant</b></p>  <p>Objective: mobilize pelvis and spine, and strengthen gluteus, hamstring and gastrocnemius muscles.</p>                                     | <p><b>Bridge Variant</b></p>  <p>Objective: mobilize pelvis and spine and strengthen gluteus, quadriceps femoris and hamstring muscles</p>                 |
| <p>Rolling Back Down/Up (knees flexed and rolling forward)</p>  <p>Objective: mobilize the spine and contract the abdominis muscles associated with the power house.</p> | <p>Rolling Back Down/Up (knees extended and rolling forward.)</p>  <p>Objective: mobilize the spine and contract the abdominis muscles associated with the power house.</p> | <p>Roll Up (rolling back and forward)</p>  <p>Objective: mobilize the spine and strengthen the rectus abdominis and external external oblique muscles.</p> |
| <p><b>Hamstring Stretch Variant</b></p>  <p>Objective: mobilize the spine and stretch the muscles of the posterior chain.</p>                                          | <p><b>Hamstring Stretch Variant (crossed legs)</b></p>  <p>Objective: mobilize the spine and stretch the muscles of the posterior chain.</p>                              | <p><b>Hamstring Stretch (ball)</b></p>  <p>Objective: mobilize the spine and stretch the muscles of the posterior chain.</p>                             |

Stretches Front Variant (standing with the ball)

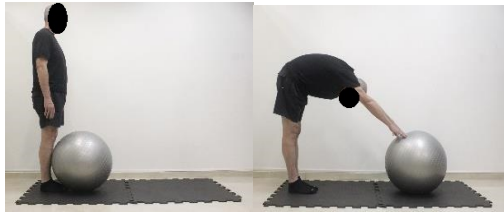

Objective: mobilize the spine and stretch the muscles of the posterior chain.

Hamstring Stretch Variant (sitting on the floor with one leg extended and the other one flexed)

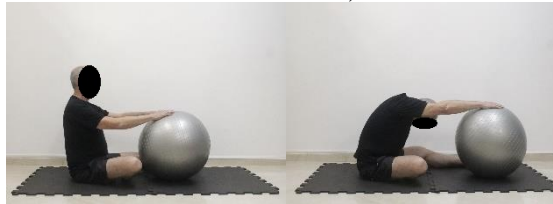

Objective: mobilize the spine and stretch the muscles of the posterior chain.

Spine Stretch (sitting on the floor with both legs extended)

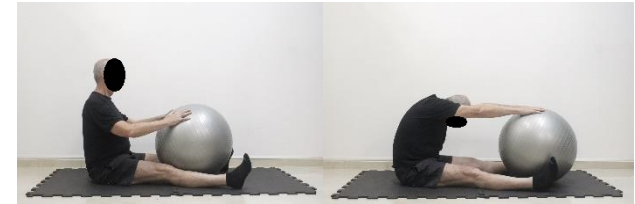

Objective: mobilize the spine and stretch the muscles of the posterior chain.

Swan Front

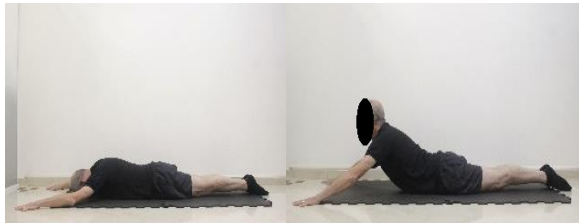

Objective: mobilize spine, stretching the muscles of the anterior chain, and strengthen pectoralis major, triceps brachii and anterior deltoid muscles.

Swan (taking off the arms)

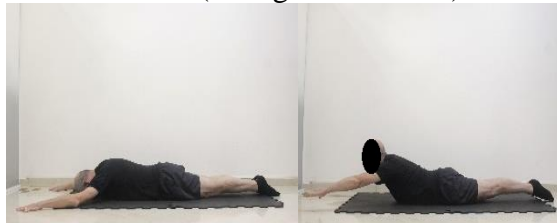

Objective: mobilize the spine, control the scapular elevation movement and strengthen posterior chain muscles.

Swan (taking off arms and legs alternate)

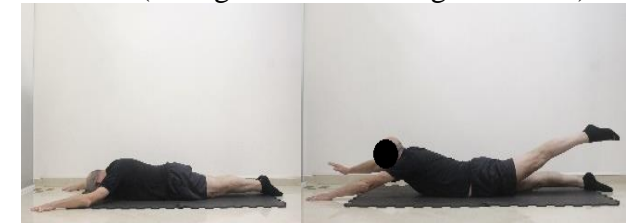

Objective: mobilize the spine, control the scapular elevation movement and strengthen posterior chain muscles.

Tower (in "V" position with the elastic forward and upward)

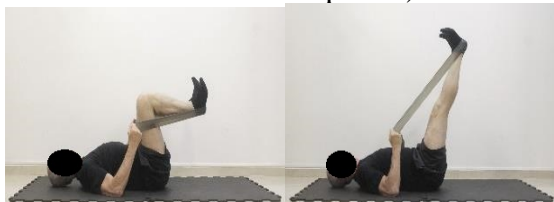

Objective: stretch the posterior chain muscles and strengthen the abdominis, quadriceps femoris and iliopsoas muscles.

Long Spine (in "V" position with the elastic forward and downwards)

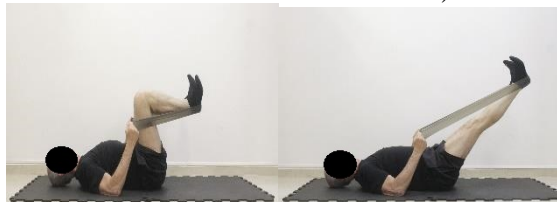

Objective: stretch the posterior chain muscles and strengthen the abdominis, quadriceps femoris and iliopsoas muscles.

Jackknife

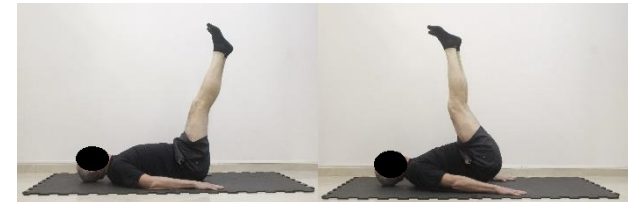

Objective: mobilize the spine and strengthen the abdominis, quadriceps femoris and iliopsoas muscles.

Mermaid (both hands on the ball)

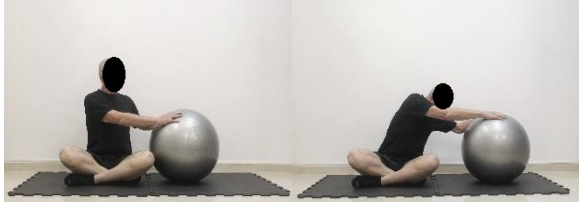

Objective: stretch lateral chain muscles and control scapular elevation movement.

Mermaid (one hand on the ball)

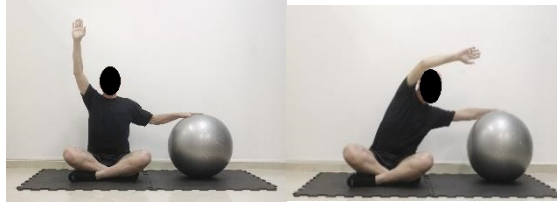

Objective: stretch lateral chain muscles and control scapular elevation movement.

Side Arm Sit Variant

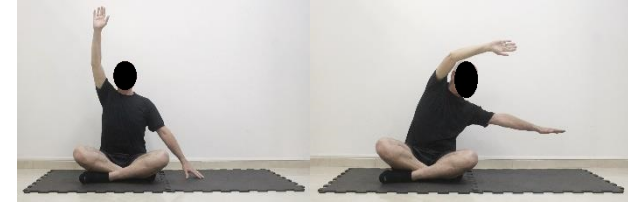

Objective: stretch lateral chain muscles and control scapular elevation movement.

**Lower Limbs Exercises**

**Basic**

**Tower (with the elastic on one leg)**

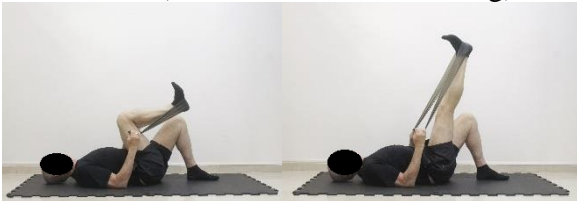

Objective: stretch the posterior chain muscles and strengthen the quadriceps femoris and gluteus maximus muscles.

**Intermediate**

**Tower (with the elastic on both legs)**

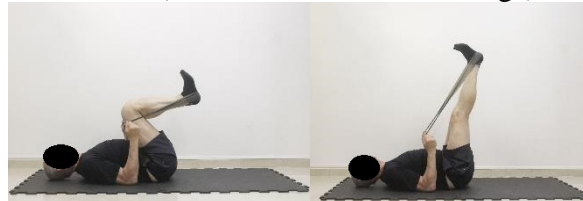

Objective: stretch the posterior chain muscles and strengthen the quadriceps femoris and gluteus maximus muscles.

**Advanced**

**Tower (with the elastic on one leg)**

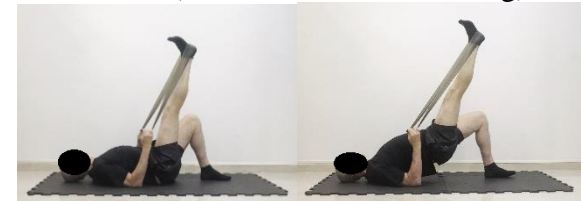

Objective: stretch the posterior chain muscles and strengthen the quadriceps femoris, hamstrings and gluteus maximus muscles.

**Footwork (taking the foot support)**

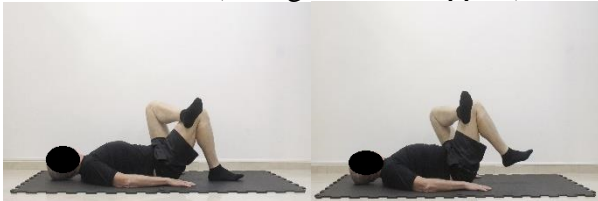

Objective: stretch the gluteus maximus and piriformis muscles and strengthen the quadriceps femoris muscle.

**One Leg Up and Down (with the ball)**

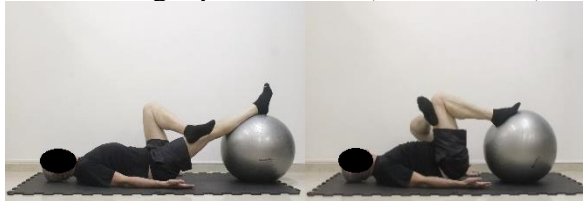

Objective: stretch the gluteus maximus and piriformis muscles and strengthen abdominis, iliopsoas and quadriceps femoris muscles.

**Tower**

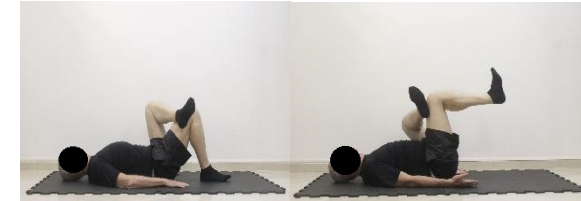

Objective: stretch the gluteus maximus and piriformis muscles and strengthen the quadriceps femoris muscle.

**Leg Circles (small)**

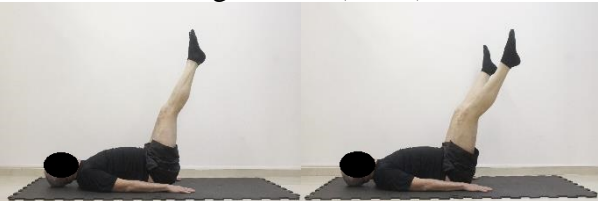

Objective: strengthen gluteus maximus, hamstrings, adductor magnus, adductor longus, pectineus and gracilis muscles.

**Leg Circle (medium)**

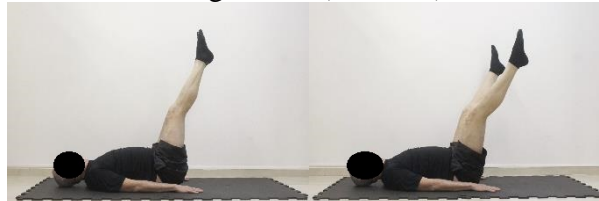

Objective: strengthen gluteus maximus, hamstrings, adductor magnus, adductor longus, pectineus and gracilis muscles.

**Leg Circles (big)**

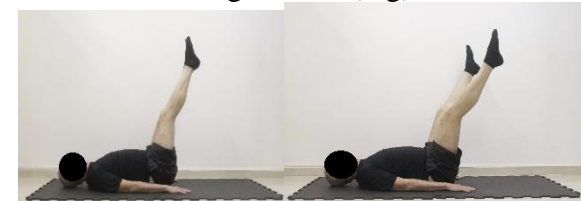

Objective: strengthen gluteus maximus, hamstrings, adductor magnus, adductor longus, pectineus and gracilis muscles.

Bicycle (with mild elastic)

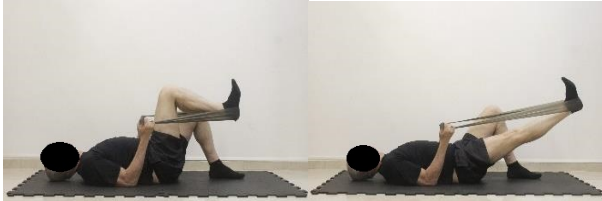

Objective: strengthen the gluteus maximus, quadriceps femoris, abdominis and hamstring muscles.

Bicycle (with heavy elastic)

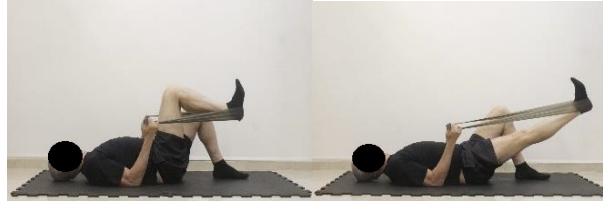

Objective: strengthen the gluteus maximus, quadriceps femoris, abdominis and hamstring muscles

Bicycle (both legs on the air)

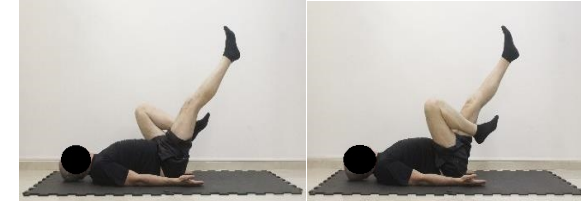

Objective: strengthen the gluteus maximus, hamstring, sartorius, gracillis and gastrocnemius muscles.

Footwork Hells V Position (with the elastic band)

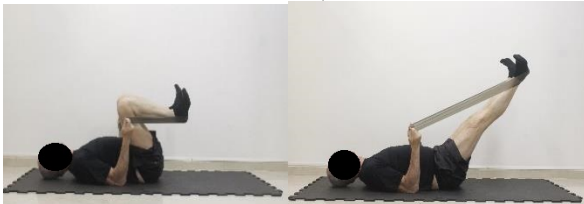

Objective: strengthen the quadriceps femoris, abdominis, adductor magnus, adductor longus, pectineus and gracillis muscles.

Leg Series Supine Frog (with the elastic band)

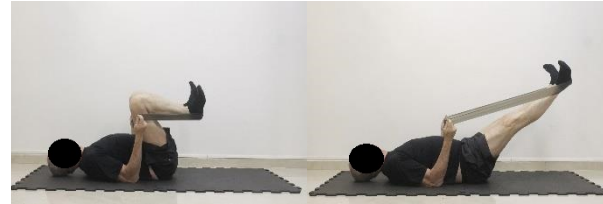

Objective: strengthen the quadriceps femoris, abdominis, adductor magnus, adductor longus, pectineus and gracillis muscles.

Knee Extension V Position (with the elastic band)

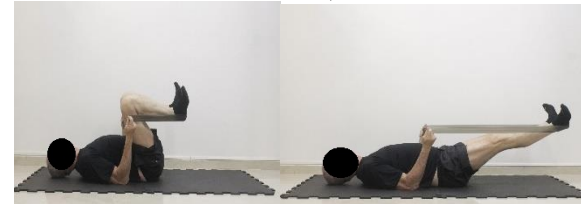

Objective: strengthen the quadriceps femoris, abdominis, adductor magnus, adductor longus, pectineus and gracillis muscles.

Footwork Double Legato (four supports rising one leg)

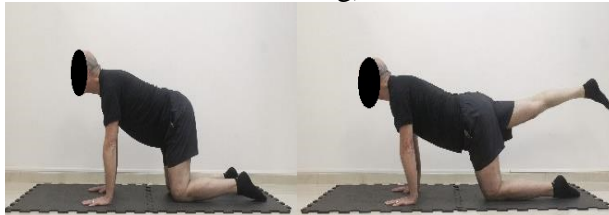

Objective: strengthen the quadriceps femoris, triceps surae, iliopsoas and sartorius muscles.

Footwork Double Legato (four supports with mild elastic band)

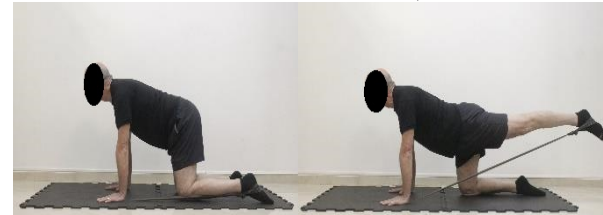

Objective: strengthen the quadriceps femoris, triceps surae, iliopsoas and sartorius muscles.

Footwork Double Legato (four supports with heavy elastic band)

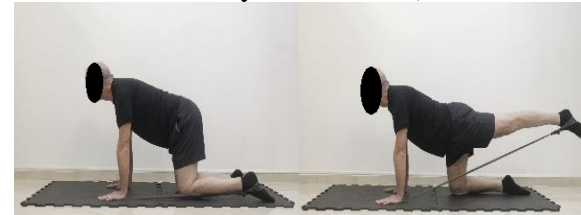

Objective: strengthen the quadriceps femoris, triceps surae, iliopsoas and sartorius muscles.



Side Kicks Up and Down

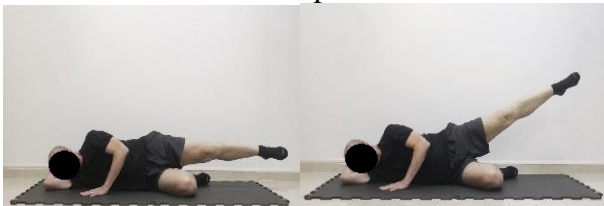

Objective: strengthen the gluteus medius and tensor fascia lata muscles.

Side Kicks Up and Down (mild weight)

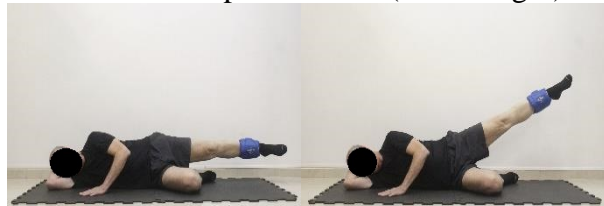

Objective: strengthen the gluteus medius and tensor fascia lata muscles.

Side Kicks Up and Down (heavy weight)

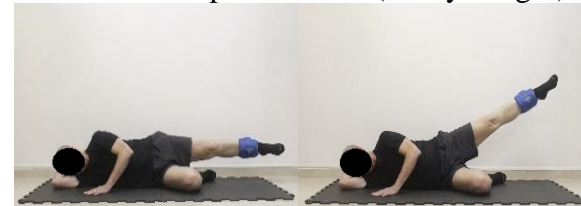

Objective: strengthen the gluteus medius and tensor fascia lata muscles.

Side Kicks Inner-Thigh Lifts

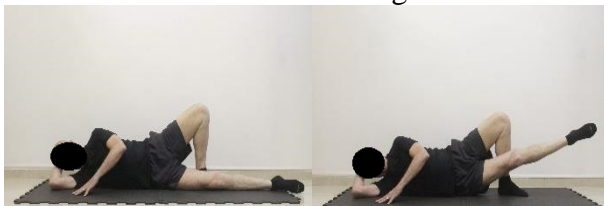

Objective: strengthen the gluteus maximus, hamstrings, adductor magno, adductor longus, pectineus and gracillis muscles.

Side Kicks Inner-Thigh Lifts (mild weight)

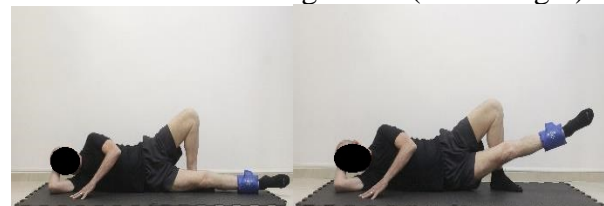

Objective: strengthen the gluteus maximus, hamstrings, adductor magno, adductor longus, pectineus and gracillis muscles.

Side Kicks Inner-Thigh Lifts (heavy weight)

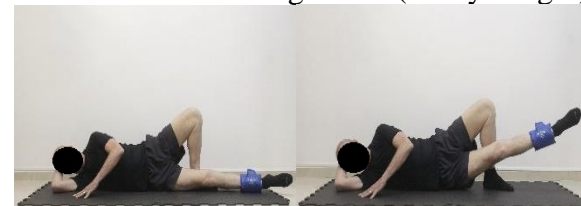

Objective: strengthen the gluteus maximus, hamstrings, adductor magno, adductor longus, pectineus and gracillis muscles.

One Leg Up-Down

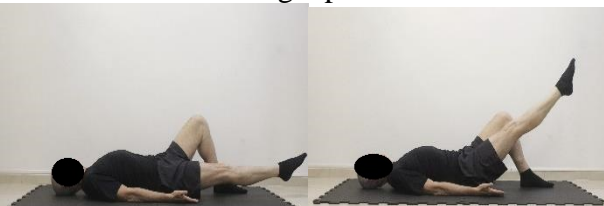

Objective: strengthen the iliopsoas, rectus femoris and rectus abdominis muscles.

One Leg Up-Down (mild weight)

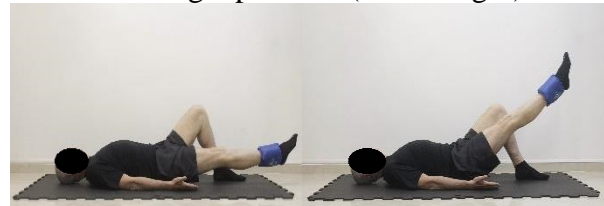

Objective: strengthen the iliopsoas, rectus femoris and rectus abdominis muscles.

One Leg Up-Down (heavy weight)

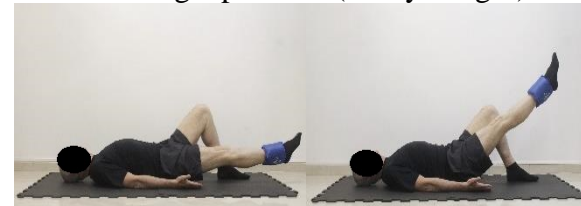

Objective: strengthen the iliopsoas, rectus femoris and rectus abdominis muscles.

Fire Hydrant

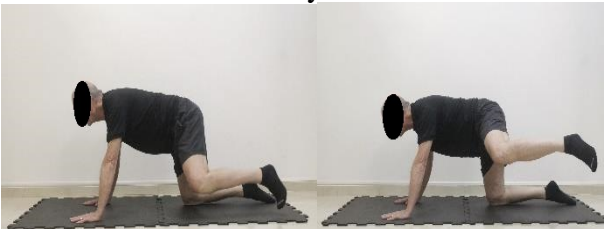

Objective: strengthen the quadriceps femoris and gluteus muscles.

Fire Hydrant (mild elastic)

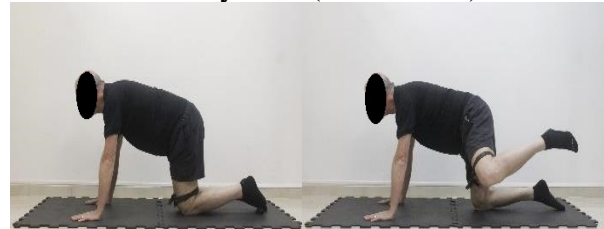

Objective: strengthen the quadriceps femoris and gluteus muscles.

Fire Hydrant (heavy elastic)

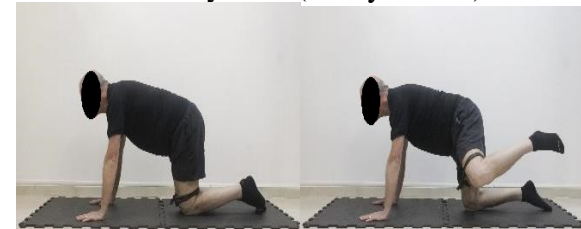

Objective: strengthen the quadriceps femoris and gluteus muscles.

Squatting with the ball on the wall

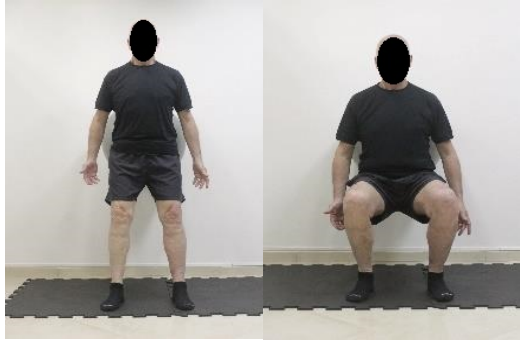

Objective: strengthen the quadriceps femoris and gluteus muscles.

One-legged squat with ball on wall

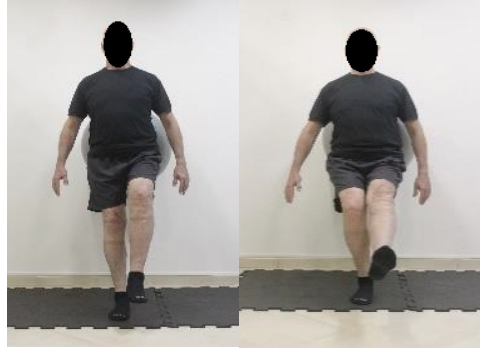

Objective: strengthen the quadriceps femoris and gluteus muscles.

Air squat

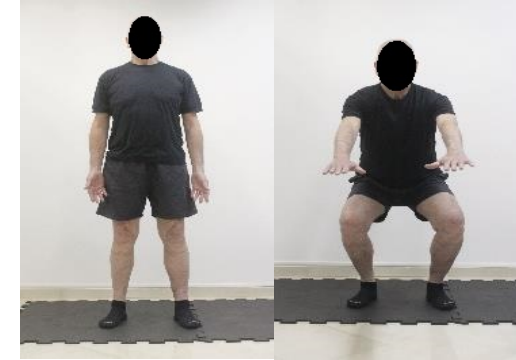

Objective: strengthen the quadriceps femoris and gluteus muscles.

Leg Series Diagonal

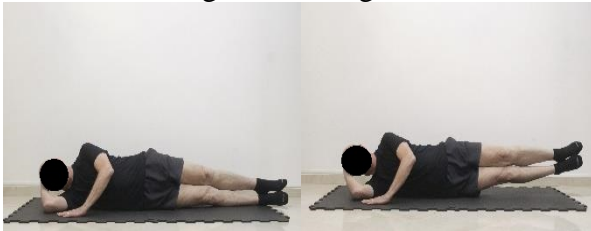

Objective: strengthen the gluteus medius and minimum, tensor fascia lata and sartorius muscles.

Leg Series Diagonal with circle

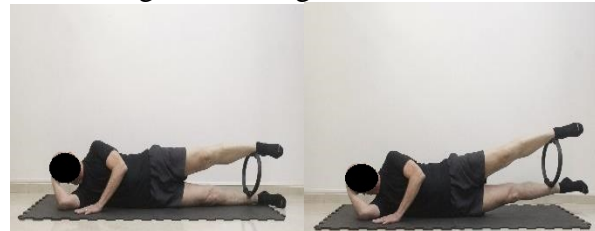

Objective: strengthen the gluteus medius and minimum, tensor fascia lata and sartorius muscles.

Leg Series Diagonal with the ball

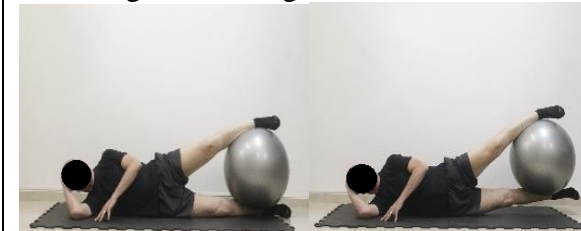

Objective: strengthen the gluteus medius and minimum, tensor fascia lata and sartorius muscles.

Horse

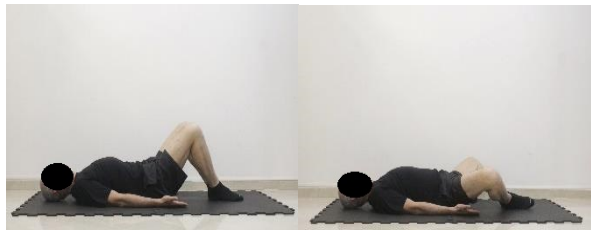

Objective: strengthen the abductor muscles of the hip.

Horse (mild elastic)

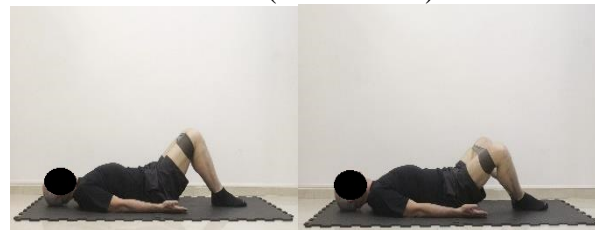

Objective: strengthen the abductor muscles of the hip.

Horse (heavy elastic)

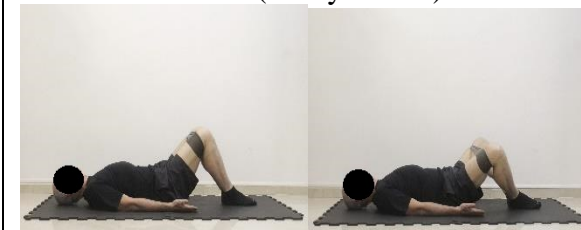

Objective: strengthen the abductor muscles of the hip.

## Upper Limbs Exercises

| Basic                                                                                                                                                                                                                                                                                                                          | Intermediate                                                                                                                                                                                                                                                                                                                                                | Advanced                                                                                                                                                                                                                                                                                                                                                      |
|--------------------------------------------------------------------------------------------------------------------------------------------------------------------------------------------------------------------------------------------------------------------------------------------------------------------------------|-------------------------------------------------------------------------------------------------------------------------------------------------------------------------------------------------------------------------------------------------------------------------------------------------------------------------------------------------------------|---------------------------------------------------------------------------------------------------------------------------------------------------------------------------------------------------------------------------------------------------------------------------------------------------------------------------------------------------------------|
| <p style="text-align: center;"><b>Arms Biceps (with the elastic)</b></p> 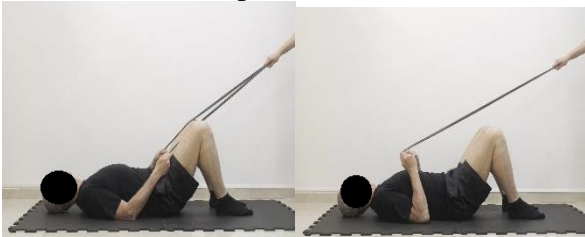 <p style="text-align: center;">Objective: strengthen the biceps brachii, brachialis and rectus abdominis muscles.</p>                                               | <p style="text-align: center;"><b>Arms Biceps (flexed legs with the elastic)</b></p>  <p style="text-align: center;">Objective: strengthen the biceps brachii, brachialis and rectus abdominis muscles.</p>                                                               | <p style="text-align: center;"><b>Arms Biceps (standing with the elastic)</b></p>  <p style="text-align: center;">Objective: strengthen the biceps brachii, brachialis and rectus abdominis muscles.</p>                                                                   |
| <p style="text-align: center;"><b>Arms Pull Up and Down</b></p>  <p style="text-align: center;">Objective: strengthen deltoid and trapezius muscles.</p>                                                                                      | <p style="text-align: center;"><b>Arms Pulling (mild elastic)</b></p>  <p style="text-align: center;">Objective: strengthen rhomboid, posterior deltoid, teres minor, infraspinatus, supraspinatus and medial and lower trapezius fibers muscles.</p>                     | <p style="text-align: center;"><b>Arms Pulling Variant (heavy elastic)</b></p>  <p style="text-align: center;">Objective: strengthen rhomboid, posterior deltoid, teres minor, infraspinatus, supraspinatus and medial and lower trapezius fibers muscles.</p>             |
| <p style="text-align: center;"><b>Arms Pull Up and Down Variant (mild elastic)</b></p>  <p style="text-align: center;">Objective: strengthen the deltoid, latissimus dorsi, teres major, pectoralis major and coracobrachialis muscles.</p> | <p style="text-align: center;"><b>Arms Pull Up and Down Variant (flexed knees and mild elastic)</b></p>  <p style="text-align: center;">Objective: strengthen the abdominis, deltoid, latissimus dorsi, teres major, pectoralis major and coracobrachialis muscles.</p> | <p style="text-align: center;"><b>Arms Pull Up and Down Variant (flexed knees and heavy elastic)</b></p>  <p style="text-align: center;">Objective: strengthen the abdominis, deltoid, latissimus dorsi, teres major, pectoralis major and coracobrachialis muscles.</p> |



Arms Triceps (mild elastic)

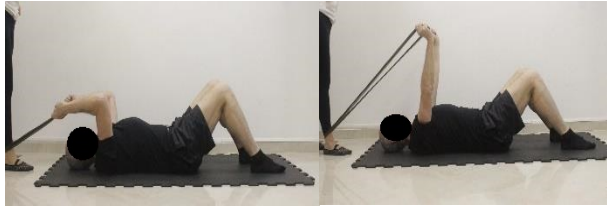

Objective: strengthen the triceps brachii muscle.

Arm Triceps (mild elastic without feet support)

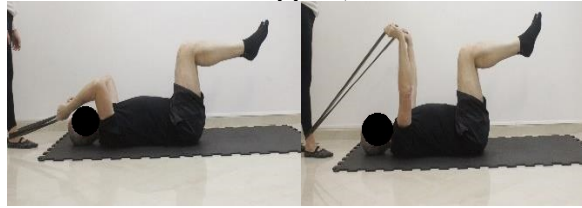

Objective: strengthen the triceps brachii and abdominis muscles.

Arm Triceps (heavy elastic without feet support)

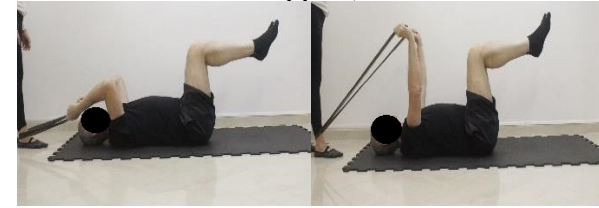

Objective: strengthen the triceps brachii and abdominis muscles.

**Abdominal Exercises**

**Basic**

**Teaser**

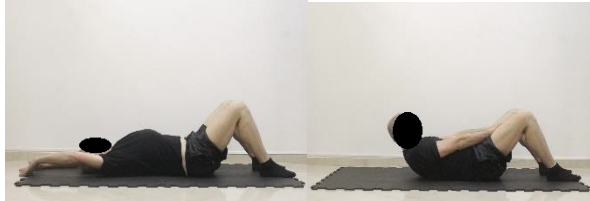

Objective: stretch the adductor magnus, adductor longus, adductor minimum, pectineus and gracillis muscles and strengthen the rectus abdominis and external oblique muscles.

**Intermediate**

**The Hundred Variant (with feet on the air)**

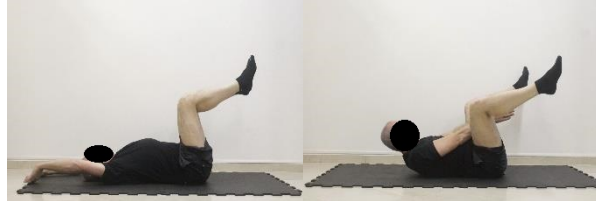

Objective: work coordination, stretch adductor, pectineus and gracillis muscles and strengthen the rectus abdominis, external oblique, latissimus dorsi and teres major muscles.

**Advanced**

**Exercise On the Ball**

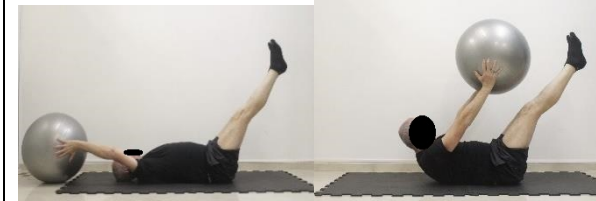

Objective: work coordination, stretch adductor, pectineus and gracillis muscles and strengthen the rectus abdominis, external oblique, latissimus dorsi and teres major muscles.

**The Hundred (pumping arms and stretching legs)**

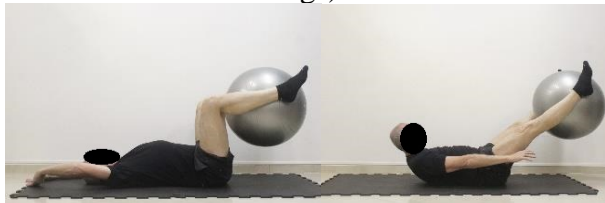

Objective: work coordination and strengthen the rectus abdominis and external oblique muscles.

**The Hundred (raising the ball)**

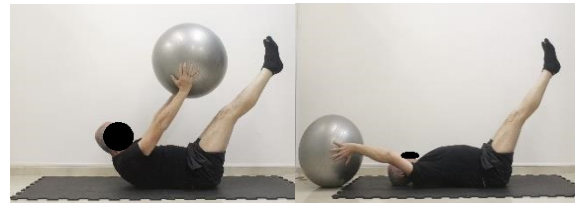

Objective: work coordination and strengthen the rectus abdominis and external oblique muscles.

**The Hundred Variant (side)**

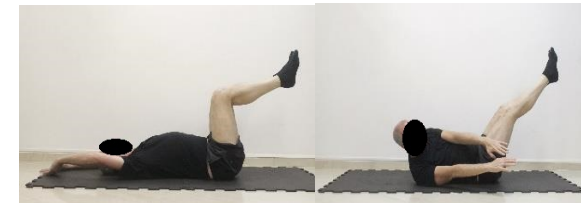

Objective: work coordination and strengthen the rectus abdominis and external oblique muscles.

Bridge with knees and feet supported

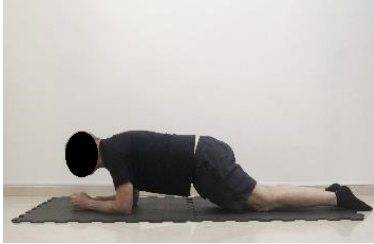

Objective: strengthen the abdominis rectus, internal oblique, external oblique, iliopsoas, pectoral and triceps brachii muscles.

Bridge with knees supported

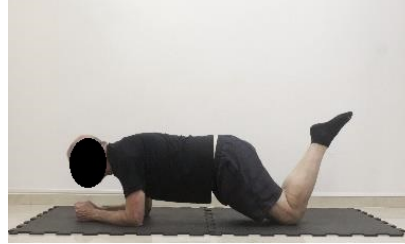

Objective: strengthen the abdominis rectus, internal oblique, external oblique, iliopsoas, pectoral and triceps brachii muscles.

Bridge

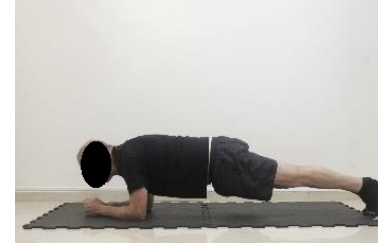

Objective: strengthen the abdominis rectus, internal oblique, external oblique, iliopsoas, pectoral and triceps brachii muscles.
